# Supplementary material for: The utility of the rapid emergency medicine score (REMS) compared with SIRS, qSOFA and NEWS for Predicting in-hospital Mortality among Patients with suspicion of Sepsis in an emergency department
Source: PubMed Central journal article supplement (PMC7792356; doi:10.1186/s12873-020-00396-x), 2021-01-07
Supplement: 12873_2020_396_MOESM2_ESM.pdf [file 12873_2020_396_MOESM2_ESM.pdf]

**Table S2.** Subgroup analyses of discrimination for in-hospital mortality and mortality within 7 days of admission

|                                                                            | Age                     |                         | Comorbidities                 |                                |
|----------------------------------------------------------------------------|-------------------------|-------------------------|-------------------------------|--------------------------------|
|                                                                            | Age<70                  | Age≥70                  | Without chronic comorbidities | At least 1 chronic comorbidity |
|                                                                            | AUROC<br>(95%CI)        | AUROC<br>(95%CI)        | AUROC<br>(95%CI)              | AUROC<br>(95%CI)               |
| <b>Discrimination for in-hospital mortality</b>                            |                         |                         |                               |                                |
| SIRS                                                                       | 0.514<br>(0.463, 0.564) | 0.537<br>(0.502, 0.573) | 0.528<br>(0.459, 0.597)       | 0.522<br>(0.490, 0.553)        |
| qSOFA                                                                      | 0.530<br>(0.485, 0.579) | 0.601<br>(0.567, 0.634) | 0.592<br>(0.525, 0.658)       | 0.574<br>(0.544, 0.605)        |
| NEWS                                                                       | 0.583<br>(0.531, 0.636) | 0.618<br>(0.580, 0.656) | 0.630<br>(0.551, 0.703)       | 0.603<br>(0.568, 0.637)        |
| REMS                                                                       | 0.607<br>(0.556, 0.678) | 0.639<br>(0.602, 0.673) | 0.672<br>(0.597, 0.742)       | 0.609<br>(0.576, 0.642)        |
| <b>Pairwise AUROC comparisons for in-hospital mortality</b>                |                         |                         |                               |                                |
| SIRS vs. qSOFA                                                             | 0.63                    | **0.009                 | 0.20                          | *0.02                          |
| SIRS vs. NEWS                                                              | *0.02                   | ***<0.001               | *0.02                         | ***<0.001                      |
| SIRS vs. REMS                                                              | **0.005                 | ***<0.001               | **0.005                       | ***<0.001                      |
| qSOFA vs. NEWS                                                             | *0.04                   | 0.35                    | 0.32                          | 0.08                           |
| qSOFA vs. REMS                                                             | **0.006                 | 0.05                    | *0.04                         | 0.05                           |
| NEWS vs. REMS                                                              | 0.35                    | 0.26                    | 0.28                          | 0.70                           |
| <b>Discrimination for mortality within 7 days of admission</b>             |                         |                         |                               |                                |
| SIRS                                                                       | 0.524<br>(0.464, 0.582) | 0.553<br>(0.513, 0.593) | 0.507<br>(0.427, 0.590)       | 0.547<br>(0.511, 0.584)        |
| qSOFA                                                                      | 0.541<br>(0.485, 0.601) | 0.613<br>(0.572, 0.653) | 0.606<br>(0.520, 0.687)       | 0.585<br>(0.549, 0.623)        |
| NEWS                                                                       | 0.612<br>(0.548, 0.672) | 0.631<br>(0.587, 0.675) | 0.595<br>(0.496, 0.688)       | 0.632<br>(0.593, 0.671)        |
| REMS                                                                       | 0.629<br>(0.569, 0.688) | 0.664<br>(0.622, 0.706) | 0.698<br>(0.608, 0.779)       | 0.632<br>(0.592, 0.670)        |
| <b>Pairwise AUROC comparisons for mortality within 7 days of admission</b> |                         |                         |                               |                                |
| SIRS vs. qSOFA                                                             | 0.68                    | *0.04                   | 0.08                          | 0.15                           |
| SIRS vs. NEWS                                                              | *0.02                   | **0.003                 | 0.22                          | ***<0.001                      |
| SIRS vs. REMS                                                              | **0.005                 | ***<0.001               | **0.002                       | ***<0.001                      |
| qSOFA vs. NEWS                                                             | *0.02                   | 0.39                    | 0.81                          | *0.02                          |
| qSOFA vs. REMS                                                             | **0.007                 | *0.02                   | 0.06                          | *0.03                          |
| NEWS vs. REMS                                                              | 0.57                    | 0.12                    | *0.02                         | 0.99                           |

Notes: Pairwise comparisons were by bootstrap test. n of mortality outcome/subgroup N for in-hospital mortality: < 70 years old = 152/587; ≥70 years-old = 305/1035; no chronic comorbidities = 71/362; at least one chronic comorbidity = 386/1260 and for mortality within 7 days of admission n/N: < 70 years-old = 91/587; ≥70 years-old = 189/1035; no chronic comorbidities = 44/362; at least one chronic comorbidity = 236/1260.

Abbreviations: AUROC, area under the receiver operator characteristic curve; CI, confidence interval; SIRS, systemic inflammatory response syndrome; qSOFA, quick Sequential Organ Failure Assessment; NEWS, National Early Warning Score; REMS, Rapid Emergency Medicine Score.
