# Supplementary material for: The utility of the rapid emergency medicine score (REMS) compared with SIRS, qSOFA and NEWS for Predicting in-hospital Mortality among Patients with suspicion of Sepsis in an emergency department
Source: PubMed Central journal article supplement (PMC7792356; doi:10.1186/s12873-020-00396-x), 2021-01-07
Supplement: 12873_2020_396_MOESM3_ESM.pdf [file 12873_2020_396_MOESM3_ESM.pdf]

**Table S3.** Pairwise comparisons of area under the receiver operator characteristic curve of baseline mortality risk models and baseline mortality risk models plus early warning scores for in-hospital mortality and mortality within 7 days of admission among patients with suspected sepsis

|                         |                | In-hospital mortality |           |           |           |           |
|-------------------------|----------------|-----------------------|-----------|-----------|-----------|-----------|
|                         |                | Baseline model        | SIRS      | qSOFA     | NEWS      | REMS      |
| Mortality within 7 days | Baseline model |                       | *0.02     | ***<0.001 | ***<0.001 | ***<0.001 |
|                         | SIRS           | **0.002               |           | 0.07      | **0.002   | ***<0.001 |
|                         | qSOFA          | ***<0.001             | 0.09      |           | 0.17      | *0.02     |
|                         | NEWS           | ***<0.001             | *0.001    | 0.09      |           | 0.16      |
|                         | REMS           | ***<0.001             | ***<0.001 | **0.006   | 0.15      |           |

Notes: comparisons of baseline risk model vs. + EWS were performed by likelihood ratio test for nested models, and other pairwise comparison were performed by bootstrap test.

Abbreviations: NEWS, National Early Warning Score; qSOFA, quick Sequential Organ Failure Assessment; REMS, Rapid Emergency Medicine Score; SIRS, systemic inflammatory response syndrome. Notes:- \*p<0.05 \*\*p<0.01 \*\*\*p<0.001
