# Supplementary material for: The utility of the rapid emergency medicine score (REMS) compared with SIRS, qSOFA and NEWS for Predicting in-hospital Mortality among Patients with suspicion of Sepsis in an emergency department
Source: PubMed Central journal article supplement (PMC7792356; doi:10.1186/s12873-020-00396-x), 2021-01-07
Supplement: 12873_2020_396_MOESM4_ESM.pdf [file 12873_2020_396_MOESM4_ESM.pdf]

**Table S4.** Additional predictive performance contributions of early warning scores to a baseline risk model with gender, age and Charlson Comorbidity Index for all-cause in-hospital mortality and all-cause mortality within 7 days of admission in patients with suspected sepsis

|                                             | Discrimination          | Discrimination improvement                       |                                 |                                 | Calibration                 | Overall performance          |                                 |
|---------------------------------------------|-------------------------|--------------------------------------------------|---------------------------------|---------------------------------|-----------------------------|------------------------------|---------------------------------|
|                                             | AUROC<br>(95%CI)        | IDI<br>Baseline + EWS vs.<br>Baseline<br>(95%CI) | Change in<br>sensitivity<br>(%) | Change in<br>specificity<br>(%) | Hosmer-<br>Lemeshow<br>test | Scaled Brier<br>score<br>(%) | Nagelkerke's<br>R square<br>(%) |
| <b>In-hospital mortality</b>                |                         |                                                  |                                 |                                 |                             |                              |                                 |
| Baseline model                              | 0.576<br>(0.547, 0.608) | -                                                | -                               | -                               | 0.211                       | 1.3                          | 1.3                             |
| Baseline + SIRS                             | 0.584<br>(0.553, 0.614) | 0.003<br>(0.000, 0.011)                          | 0.795                           | - 0.327                         | 0.185                       | 1.6                          | 1.6                             |
| Baseline + qSOFA                            | 0.609<br>(0.577, 0.639) | 0.020<br>(0.009, 0.038)                          | 4.95                            | - 2.04                          | 0.150                       | 3.3                          | 3.2                             |
| Baseline + NEWS                             | 0.626<br>(0.596, 0.657) | 0.029<br>(0.014, 0.048)                          | 7.04                            | - 2.89                          | 0.143                       | 4.2                          | 4.0                             |
| Baseline + REMS                             | 0.643<br>(0.613, 0.673) | 0.040<br>(0.024, 0.062)                          | 9.98                            | - 4.10                          | 0.318                       | 5.4                          | 5.2                             |
| <b>Mortality within 7 days of admission</b> |                         |                                                  |                                 |                                 |                             |                              |                                 |
| Baseline model                              | 0.612<br>(0.577, 0.647) | -                                                | -                               | -                               | 0.128                       | 2.2                          | 2.2                             |
| Baseline + SIRS                             | 0.621<br>(0.586, 0.656) | 0.006<br>(0.001, 0.016)                          | 2.71                            | - 0.641                         | 0.421                       | 2.8                          | 2.7                             |
| Baseline + qSOFA                            | 0.647<br>(0.610, 0.682) | 0.018<br>(0.006, 0.035)                          | 7.64                            | - 1.80                          | 0.276                       | 3.9                          | 3.8                             |
| Baseline + NEWS                             | 0.670<br>(0.577, 0.647) | 0.032<br>(0.017, 0.054)                          | 14.0                            | - 3.31                          | 0.340                       | 5.1                          | 5.0                             |
| Baseline + REMS                             | 0.688<br>(0.655, 0.721) | 0.042<br>(0.025, 0.068)                          | 18.3                            | - 4.32                          | 0.075                       | 6.2                          | 6.1                             |

Notes: change in sensitivity was calculated as  $(\text{average } \widehat{Pr} \text{ events baseline + EWS model} - \text{average } \widehat{Pr} \text{ events baseline model}) \div \text{average } \widehat{Pr} \text{ events baseline model}$ . Change in specificity was calculated as  $(\text{average } \widehat{Pr} \text{ nonevents baseline + EWS model} - \text{average } \widehat{Pr} \text{ nonevents baseline model}) \div \text{average } \widehat{Pr} \text{ nonevents baseline model}$ . Abbreviations= AUROC, area under the receiver operator characteristic curve; CI, confidence interval; IDI, integrated discrimination index; EWS, early warning score; SIRS, systemic inflammatory response syndrome; qSOFA, quick Sequential Organ Failure Assessment; NEWS, National Early Warning Score; REMS, Rapid Emergency Medicine Score.
