# Supplementary material for: The utility of the rapid emergency medicine score (REMS) compared with SIRS, qSOFA and NEWS for Predicting in-hospital Mortality among Patients with suspicion of Sepsis in an emergency department
Source: PubMed Central journal article supplement (PMC7792356; doi:10.1186/s12873-020-00396-x), 2021-01-07
Supplement: 12873_2020_396_MOESM5_ESM.pdf [file 12873_2020_396_MOESM5_ESM.pdf]

**Table S5.** Clinical utility of early warning scores for in-hospital mortality and mortality within 7 days of admission among subgroups

|                                       | <b>Sensitivity<br/>(95%CI)</b> | <b>Specificity<br/>(95%CI)</b> | <b>PPV<br/>(95%CI)</b> | <b>NPV<br/>(95%CI)</b> | <b>LR+<br/>(95%CI)</b> | <b>LR-<br/>(95%CI)</b> |
|---------------------------------------|--------------------------------|--------------------------------|------------------------|------------------------|------------------------|------------------------|
| <b>In-hospital mortality</b>          |                                |                                |                        |                        |                        |                        |
| <b>Age &lt; 70</b>                    |                                |                                |                        |                        |                        |                        |
| SIR $\geq$ 2                          | 85.5<br>(78.9, 90.7)           | 14.0<br>(10.9, 17.7)           | 25.9<br>(24.4, 27.3)   | 73.5<br>(63.9, 81.3)   | 1.0<br>(0.9, 1.1)      | 1.0<br>(0.7, 1.6)      |
| qSOFA $\geq$ 2                        | 39.5<br>(31.7, 47.7)           | 68.1<br>(63.4, 72.4)           | 30.2<br>(25.4, 35.4)   | 76.3<br>(73.6, 78.8)   | 1.2<br>(1.0, 1.6)      | 0.9<br>(0.8, 1.0)      |
| NEWS $\geq$ 8                         | 69.1<br>(61.1, 76.3)           | 44.6<br>(39.9, 49.4)           | 30.4<br>(27.6, 33.3)   | 80.5<br>(76.1, 84.3)   | 1.3<br>(1.1, 1.4)      | 0.7<br>(0.5, 0.9)      |
| REMS $\geq$ 9                         | 44.1<br>(36.0, 52.4)           | 70.8<br>(66.3, 75.0)           | 34.5<br>(29.5, 39.9)   | 78.4<br>(75.7, 80.9)   | 1.5<br>(1.2, 1.9)      | 0.8<br>(0.7, 0.9)      |
| <b>Age <math>\geq</math> 70</b>       |                                |                                |                        |                        |                        |                        |
| SIR $\geq$ 2                          | 85.6<br>(81.1, 89.3)           | 23.4<br>(20.3, 26.5)           | 31.8<br>(30.5, 33.1)   | 79.4<br>(74.0, 84.0)   | 1.1<br>(1.1, 1.2)      | 0.6<br>(0.5, 0.8)      |
| qSOFA $\geq$ 2                        | 48.2<br>(42.5, 54.0)           | 69.6<br>(66.1, 72.9)           | 39.8<br>(36.1, 43.7)   | 76.3<br>(74.1, 78.4)   | 1.6<br>(1.4, 1.9)      | 0.7<br>(0.7, 0.8)      |
| NEWS $\geq$ 8                         | 67.5<br>(62.0, 72.8)           | 49.6<br>(45.9, 53.3)           | 35.9<br>(33.5, 38.4)   | 78.5<br>(75.4, 81.4)   | 1.3<br>(1.2, 1.5)      | 0.7<br>(0.6, 0.8)      |
| REMS $\geq$ 9                         | 80.3<br>(75.4, 84.6)           | 35.6<br>(32.1, 39.2)           | 34.3<br>(32.5, 36.0)   | 81.3<br>(77.2, 84.7)   | 1.3<br>(1.2, 1.4)      | 0.6<br>(0.4, 0.7)      |
| <b>Without chronic comorbidities</b>  |                                |                                |                        |                        |                        |                        |
| SIR $\geq$ 2                          | 83.1<br>(72.3, 91.0)           | 18.8<br>(14.8, 23.3)           | 20.0<br>(18.2, 21.9)   | 82.0<br>(72.2, 88.9)   | 1.0<br>(0.9, 1.1)      | 0.9<br>(0.5, 1.6)      |
| qSOFA $\geq$ 2                        | 47.9<br>(35.9, 60.1)           | 70.1<br>(64.5, 75.3)           | 28.1<br>(22.5, 34.5)   | 84.7<br>(81.3, 87.5)   | 1.6<br>(1.2, 2.2)      | 0.7<br>(0.6, 0.9)      |
| NEWS $\geq$ 8                         | 71.8<br>(60.0, 81.9)           | 46.1<br>(40.2, 52.0)           | 24.5<br>(21.3, 28.0)   | 87.0<br>(81.9, 90.8)   | 1.3<br>(1.1, 1.6)      | 0.6<br>(0.4, 0.9)      |
| REMS $\geq$ 9                         | 70.4<br>(58.4, 80.7)           | 53.6<br>(47.7, 59.5)           | 27.0<br>(23.4, 31.0)   | 88.1<br>(83.6, 91.5)   | 1.5<br>(1.2, 1.8)      | 0.6<br>(0.4, 0.8)      |
| <b>At least 1 chronic comorbidity</b> |                                |                                |                        |                        |                        |                        |
| SIR $\geq$ 2                          | 86.0<br>(82.1, 89.3)           | 19.1<br>(16.6, 21.9)           | 32.0<br>(30.8, 33.1)   | 75.6<br>(70.0, 80.4)   | 1.1<br>(1.0, 1.1)      | 0.7<br>(0.6, 1.0)      |
| qSOFA $\geq$ 2                        | 44.8                           | 68.7                           | 38.7                   | 73.8                   | 1.4                    | 0.8                    |

|                                             |                      |                      |                      |                      |                   |                   |
|---------------------------------------------|----------------------|----------------------|----------------------|----------------------|-------------------|-------------------|
|                                             | (40.0, 49.9)         | (65.5, 71.7)         | (35.3, 42.3)         | (71.8, 75.7)         | (1.2, 1.7)        | (0.7, 0.9)        |
| NEWS $\geq$ 8                               | 67.4<br>(62.4, 72.0) | 48.3<br>(44.9, 51.7) | 36.5<br>(34.4, 38.7) | 77.0<br>(74.1, 79.7) | 1.3<br>(1.2, 1.4) | 0.7<br>(0.6, 0.8) |
| REMS $\geq$ 9                               | 67.9<br>(63.0, 72.5) | 47.1<br>(43.8, 50.5) | 36.2<br>(34.1, 38.4) | 76.9<br>(73.9, 79.6) | 1.3<br>(1.2, 1.4) | 0.7<br>(0.6, 0.8) |
| <b>Mortality within 7 days of admission</b> |                      |                      |                      |                      |                   |                   |
| <b>Age &lt; 70</b>                          |                      |                      |                      |                      |                   |                   |
| SIR $\geq$ 2                                | 90.1<br>(82.1, 95.4) | 14.9<br>(11.9, 18.4) | 16.3<br>(15.2, 17.4) | 89.2<br>(81.0, 94.1) | 1.1<br>(0.9, 1.1) | 0.7<br>(0.3, 1.3) |
| qSOFA $\geq$ 2                              | 42.9<br>(32.5, 53.7) | 67.7<br>(63.4, 71.8) | 19.6<br>(15.7, 24.2) | 86.6<br>(84.3, 88.6) | 1.3<br>(1.0, 1.7) | 0.8<br>(0.7, 1.0) |
| NEWS $\geq$ 8                               | 71.4<br>(61.0, 80.4) | 43.4<br>(38.9, 47.8) | 18.8<br>(16.6, 21.2) | 89.2<br>(85.5, 92.1) | 1.3<br>(1.1, 1.5) | 0.7<br>(0.5, 0.9) |
| REMS $\geq$ 10                              | 36.3<br>(26.4, 47.0) | 77.0<br>(73.1, 80.7) | 22.5<br>(17.4, 28.4) | 86.8<br>(84.9, 88.6) | 1.6<br>(1.2, 2.2) | 0.8<br>(0.7, 1.0) |
| <b>Age <math>\geq</math> 70</b>             |                      |                      |                      |                      |                   |                   |
| SIR $\geq$ 2                                | 87.8<br>(82.3, 92.1) | 22.6<br>(19.8, 25.6) | 20.2<br>(19.2, 21.3) | 89.3<br>(84.7, 92.6) | 1.1<br>(1.1, 1.2) | 0.5<br>(0.4, 0.8) |
| qSOFA $\geq$ 2                              | 52.4<br>(45.0, 59.7) | 68.1<br>(64.8, 71.2) | 26.8<br>(23.7, 30.3) | 86.5<br>(84.6, 88.2) | 1.6<br>(1.4, 1.9) | 0.7<br>(0.6, 0.8) |
| NEWS $\geq$ 8                               | 69.3<br>(62.2, 75.8) | 47.6<br>(44.2, 51.1) | 22.8<br>(20.9, 24.9) | 87.4<br>(84.7, 89.7) | 1.3<br>(1.2, 1.5) | 0.6<br>(0.5, 0.8) |
| REMS $\geq$ 10                              | 67.7<br>(60.6, 74.3) | 51.3<br>(47.8, 54.7) | 23.7<br>(21.6, 26.0) | 87.7<br>(85.1, 89.8) | 1.4<br>(1.2, 1.6) | 0.6<br>(0.5, 0.8) |
| <b>Without chronic comorbidities</b>        |                      |                      |                      |                      |                   |                   |
| SIR $\geq$ 2                                | 81.8<br>(67.3, 91.8) | 21.4<br>(17.0, 26.3) | 12.6<br>(11.0, 14.3) | 89.5<br>(81.5, 94.3) | 1.0<br>(0.9, 1.2) | 0.9<br>(0.4, 1.7) |
| qSOFA $\geq$ 2                              | 52.3<br>(36.7, 67.5) | 69.2<br>(65.8, 74.2) | 19.0<br>(14.5, 24.5) | 91.3<br>(88.4, 93.5) | 1.7<br>(1.2, 2.4) | 0.7<br>(0.5, 1.0) |
| NEWS $\geq$ 8                               | 65.9<br>(50.1, 79.5) | 43.7<br>(38.2, 49.4) | 13.9<br>(11.4, 17.0) | 90.3<br>(85.8, 93.4) | 1.2<br>(0.9, 1.5) | 0.8<br>(0.5, 1.2) |
| REMS $\geq$ 10                              | 61.4<br>(45.5, 75.6) | 63.8<br>(58.3, 69.1) | 19.0<br>(15.1, 23.6) | 92.3<br>(89.1, 94.6) | 1.7<br>(1.3, 2.2) | 0.6<br>(0.4, 0.9) |
| <b>At least 1 chronic comorbidity</b>       |                      |                      |                      |                      |                   |                   |
| SIR $\geq$ 2                                | 89.8<br>(85.3, 93.4) | 19.2<br>(16.9, 21.8) | 20.4<br>(19.6, 21.3) | 89.1<br>(84.6, 92.5) | 1.1<br>(1.1, 1.2) | 0.5<br>(0.4, 0.8) |

|                |                      |                      |                      |                      |                   |                   |
|----------------|----------------------|----------------------|----------------------|----------------------|-------------------|-------------------|
| qSOFA $\geq 2$ | 48.7<br>(42.2, 55.3) | 67.6<br>(64.6, 70.4) | 25.7<br>(22.8, 28.9) | 85.1<br>(83.4, 86.7) | 1.5<br>(1.3, 1.8) | 0.8<br>(0.7, 0.9) |
| NEWS $\geq 8$  | 70.8<br>(64.5, 76.5) | 46.8<br>(43.7, 49.9) | 23.5<br>(21.7, 25.3) | 87.4<br>(84.9, 89.5) | 1.3<br>(1.2, 1.5) | 0.6<br>(0.5, 0.8) |
| REMS $\geq 10$ | 56.8<br>(50.2, 63.2) | 59.9<br>(56.8, 62.9) | 24.6<br>(22.2, 27.2) | 85.7<br>(83.7, 87.5) | 1.4<br>(1.2, 1.6) | 0.7<br>(0.6, 0.8) |

Notes: n of mortality outcome/subgroup N for in-hospital mortality: < 70 years-old = 152/587;  $\geq 70$  years-old = 305/1035; no chronic comorbidities = 71/362; at least one chronic comorbidity = 386/1260 and for mortality within 7 days of admission n/N: < 70 years-old = 91/587;  $\geq 70$  years-old = 189/1035; no chronic comorbidities = 44/362; at least one chronic comorbidity = 236/1260

Abbreviations: CI, confidence interval; SIRS, systemic inflammatory response syndrome; qSOFA, quick Sequential Organ Failure Assessment; NEWS, National Early Warning Score; REMS, Rapid Emergency Medicine Score.
