# Supplementary material for: The utility of the rapid emergency medicine score (REMS) compared with SIRS, qSOFA and NEWS for Predicting in-hospital Mortality among Patients with suspicion of Sepsis in an emergency department
Source: PubMed Central journal article supplement (PMC7792356; doi:10.1186/s12873-020-00396-x), 2021-01-07
Supplement: 12873_2020_396_MOESM6_ESM.pdf [file 12873_2020_396_MOESM6_ESM.pdf]

### Mortality within 7 days of admission

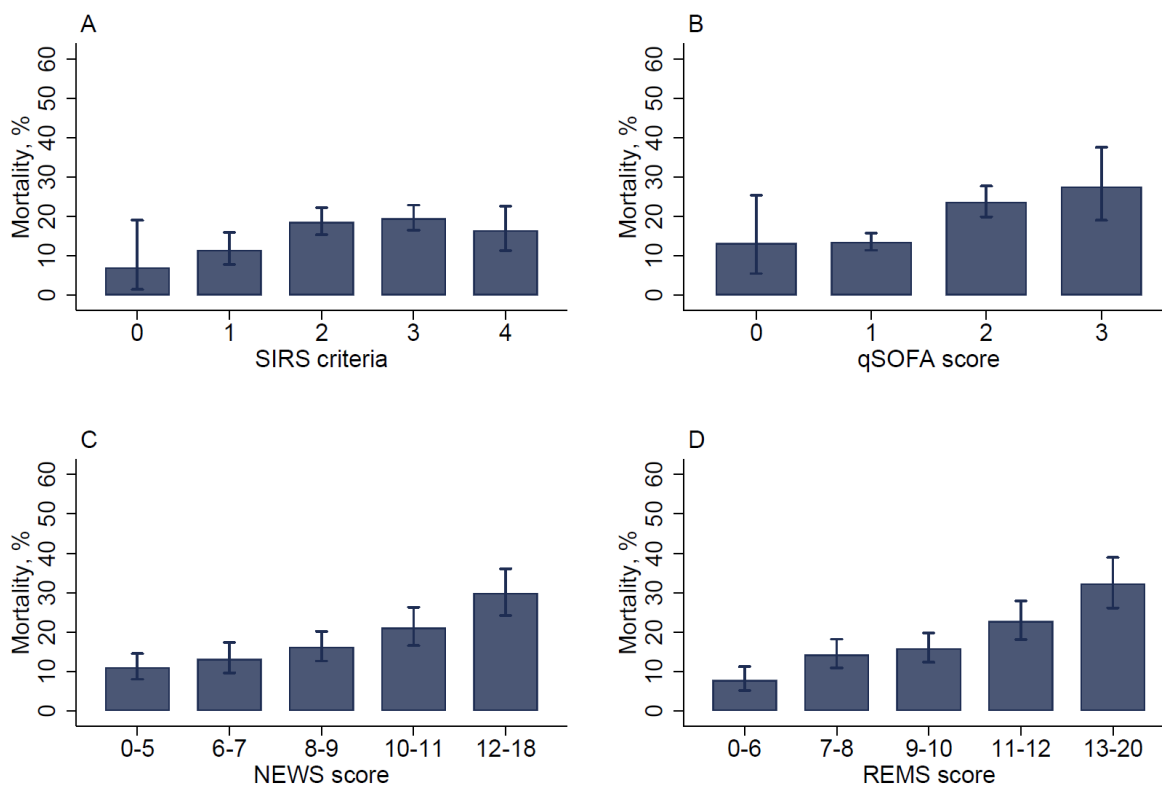

**Figure S1.** Mortality within 7 days of admission stratified by each early warning score in patients with suspected sepsis.

(A) SIRS criteria. (B) qSOFA score. (C) NEWS score. (D) REMS score. Error bars denote 95% confidence intervals. NEWS and REMS scores were categorized into 5 groups by quintiles of each score.

Abbreviations: SIRS, systemic inflammatory response syndrome; qSOFA, quick Sequential Organ Failure Assessment; NEWS, National Early Warning Score; REMS, Rapid Emergency Medicine Score.
