# Supplementary material for: The utility of the rapid emergency medicine score (REMS) compared with SIRS, qSOFA and NEWS for Predicting in-hospital Mortality among Patients with suspicion of Sepsis in an emergency department
Source: PubMed Central journal article supplement (PMC7792356; doi:10.1186/s12873-020-00396-x), 2021-01-07
Supplement: 12873_2020_396_MOESM8_ESM.pdf [file 12873_2020_396_MOESM8_ESM.pdf]

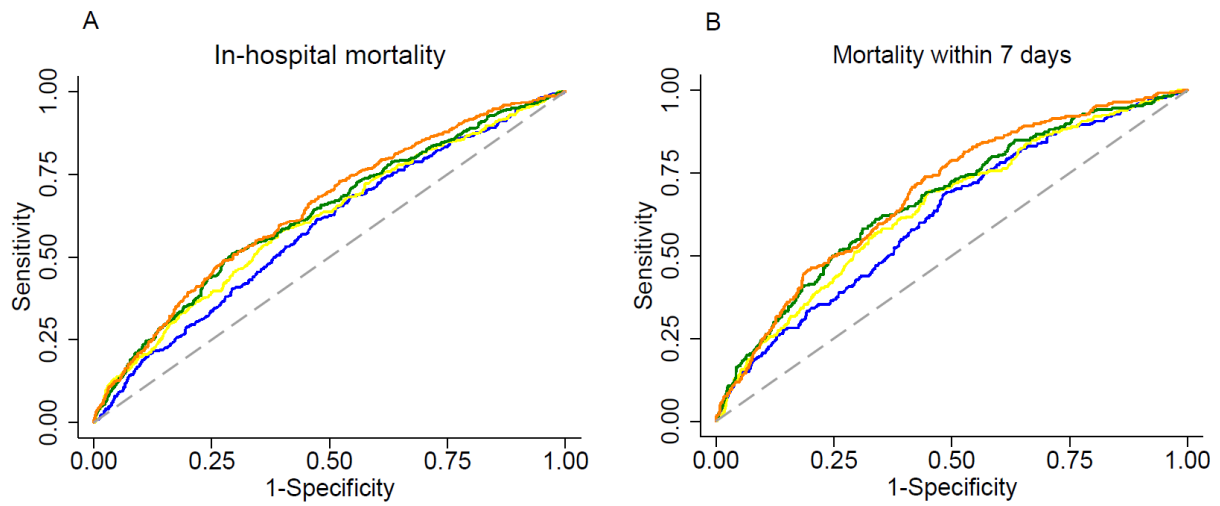

**Figure S3.** Receiver operator characteristic curves for baseline mortality risk model + early warning scores for in-hospital mortality and mortality within 7 days of admission in patients with suspected sepsis.

(A) In-hospital mortality. (B) Mortality within 7 days of admission. EWS score = SIRS (blue line), qSOFA (yellow line), NEWS (green line), and REMS (orange line). Abbreviations: SIRS, systemic inflammatory response syndrome; qSOFA, quick Sequential Organ Failure Assessment; NEWS, National Early Warning Score; REMS, Rapid Emergency Medicine Score.
